# Supplementary material for: Highly uniform nitride-rich artificial solid electrolyte interphase enabled by nano-silicon nitride for superior performance in advanced sodium metal batteries
Source: Royal Society of Chemistry journal article supplement (doi:10.1039/d4ta05595k), 2024-01-01
Supplement: d4ta05595k1.pdf [file d4ta05595k1.pdf]

## Supporting Information

### Highly Uniform Nitride-rich Artificial Solid Electrolyte Interphase Enabled by Nano-Silicon Nitride for Superior Performance in Advanced Sodium Metal Batteries

Roya Damircheli<sup>1</sup>, Binh Hoang<sup>1</sup>, Victoria Castagna Ferrari<sup>2</sup>, Chuan-Fu Lin<sup>1\*</sup>

<sup>1</sup>Department of Mechanical Engineering, Catholic University of America, Washington, DC, 20064, USA

<sup>2</sup>Department of Material Science & Engineering, University of Maryland, College Park, MD, 20742, USA

\*Corresponding Author email: [linc@cua.edu](mailto:linc@cua.edu)

#### S1:

To fabricate the artificial solid electrolyte interphase (SEI) layers, a meticulous four-step process is followed using silicon nitride ( $\text{Si}_3\text{N}_4$ ) as the key material. Initially, Step 1 involves preparing a homogeneous solution by dissolving nano-sized  $\text{Si}_3\text{N}_4$  particles in dimethyl carbonate (DMC), ensuring a thorough mixture by stirring continuously for 24 hours. The utilization of nano-sized particles addresses the previously noted issues of uneven distribution associated with micro-sized counterparts, thus promoting a more uniform SEI layer formation.

In Step 2, sodium (Na) metal substrates are prepared by cutting and polishing to obtain a flat, reflective surface. These substrates are fashioned into thin discs, onto which 50  $\mu\text{L}$  of the well-stirred  $\text{Si}_3\text{N}_4$  in DMC solution is precisely applied, ensuring consistent coverage.

Subsequently, Step 3 requires the coated Na discs to be left to dry at ambient conditions for 48 hours. This duration is critical for allowing the DMC solvent to evaporate fully, ensuring the proper deposition of  $\text{Si}_3\text{N}_4$  particles onto the Na surface.

Finally, Step 4 involves a thorough rinsing of the Na discs with DMC to remove any unreacted or loosely adhered  $\text{Si}_3\text{N}_4$  particles. Post-rinsing, the discs are subjected to an additional drying period of 24 hours to complete the preparation of the artificial nitride-rich SEI layer. This methodical approach, performed within an argon-filled glovebox to maintain an inert atmosphere, is crucial for the stability of Na electrodes and for enhancing their electrochemical performance by preventing dendrite formation during electrochemical cycling.

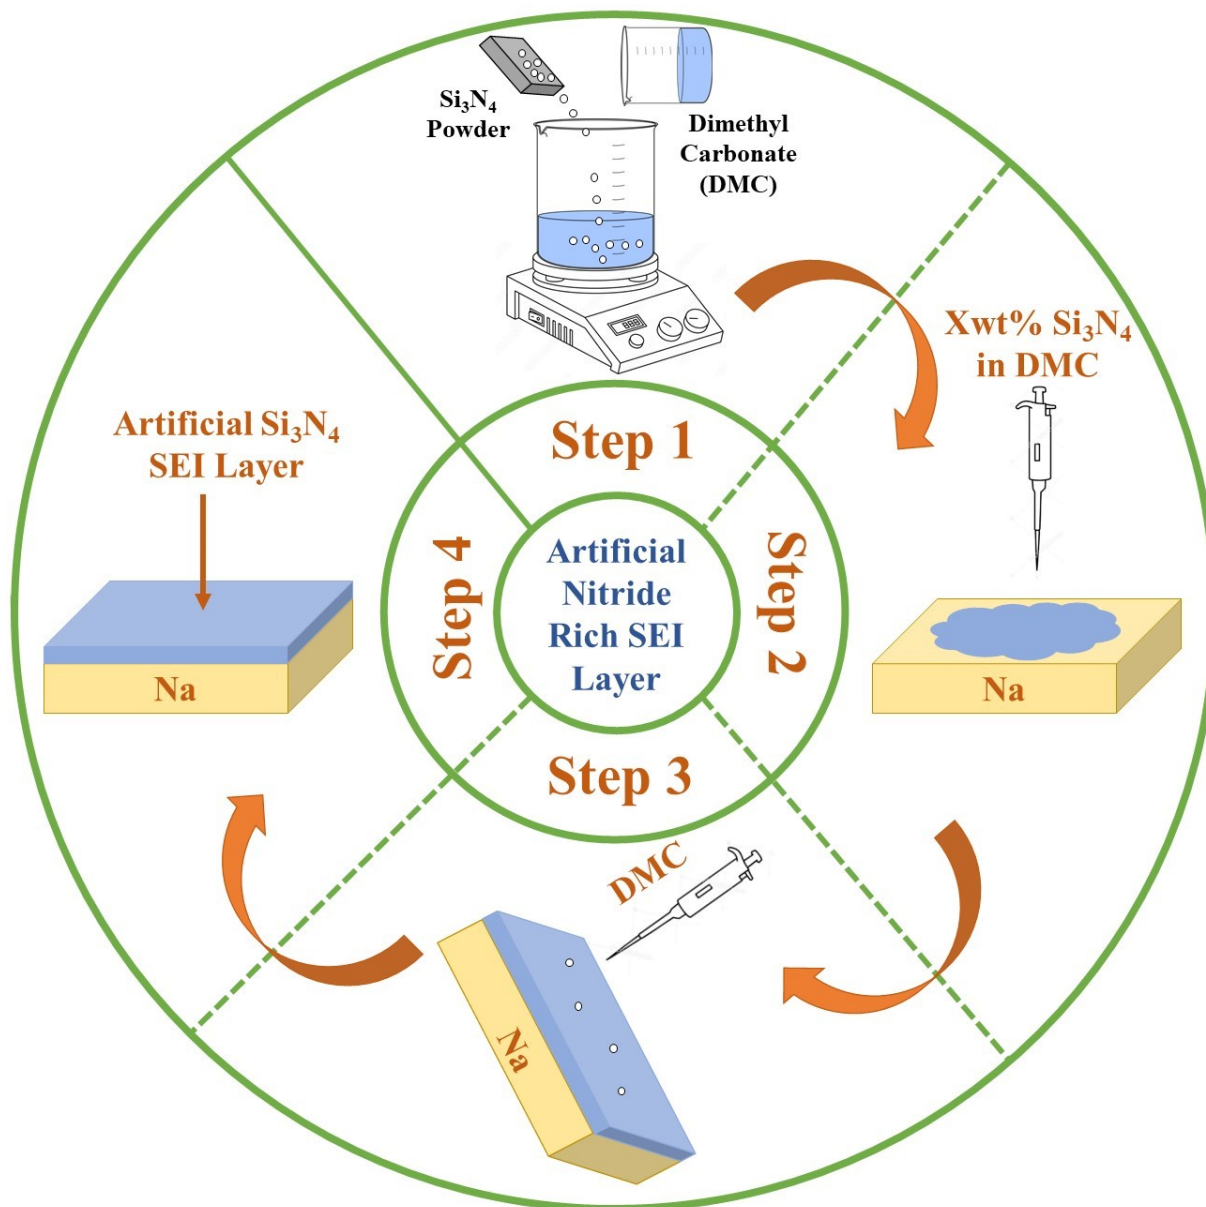

S1: Schematic illustration of Artificial  $\text{Si}_3\text{N}_4$  SEI layer formation on the Na metal surface procedure.

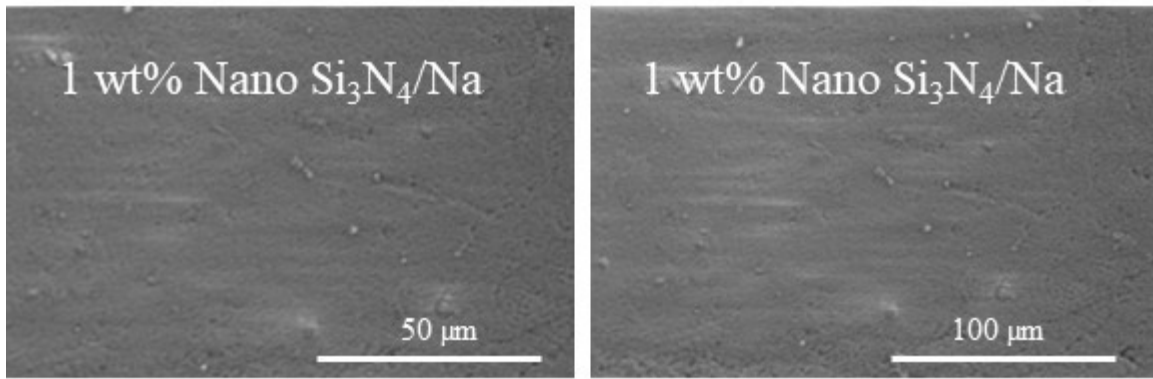

S2: High-resolution top-view SEM images of nano-size 1wt% Si<sub>3</sub>N<sub>4</sub>/Na as prepared

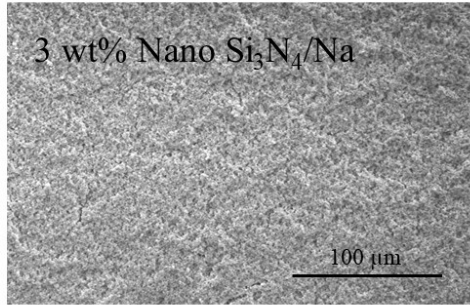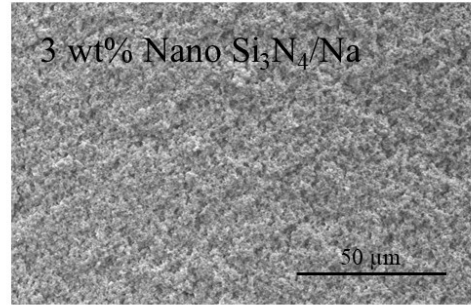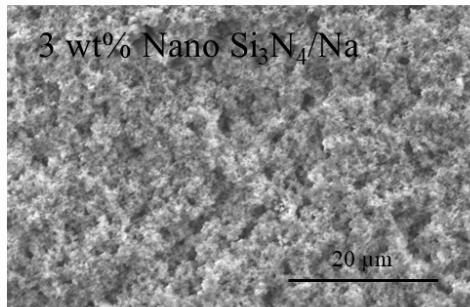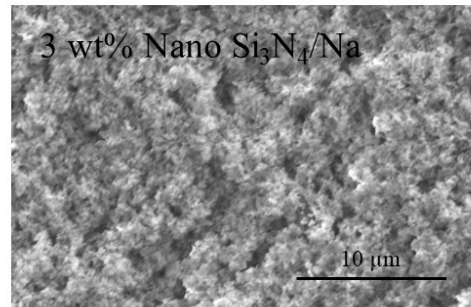

S2: High-resolution top-view SEM images of nano-size 3wt%  $\text{Si}_3\text{N}_4/\text{Na}$  as prepared

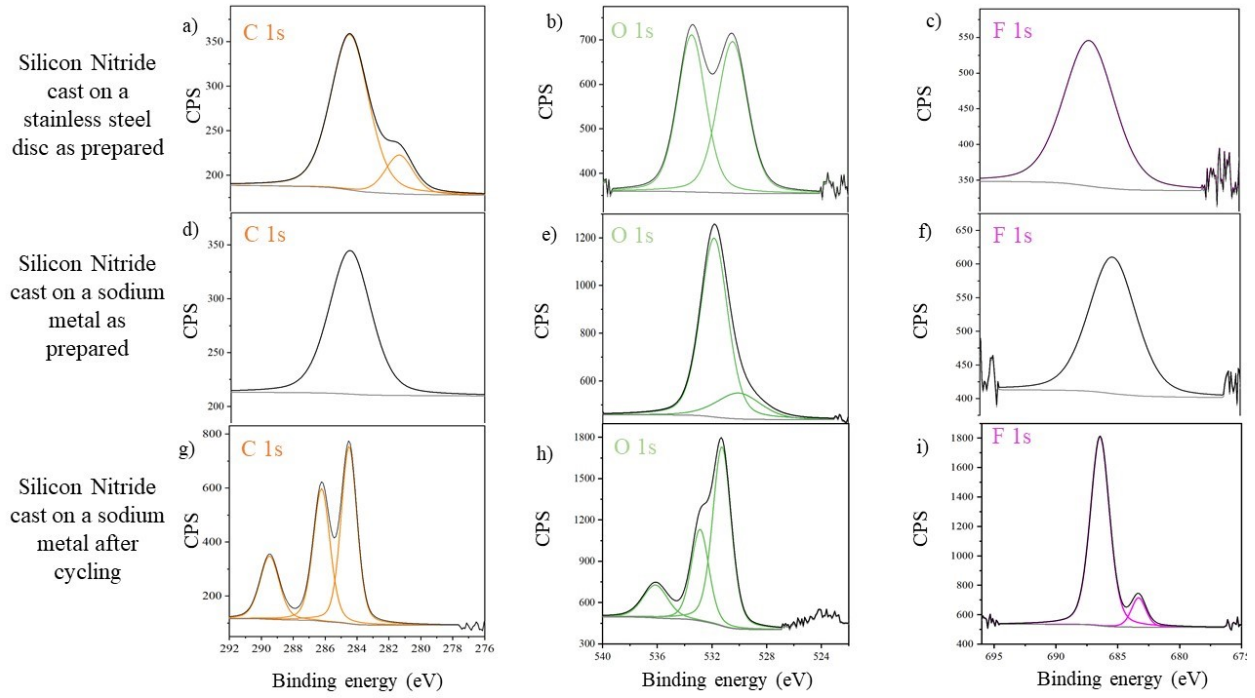

S4: High-resolution XPS spectrum of C1s, O1s and F1s of as prepared 3wt% micro-sized  $\text{Si}_3\text{N}_4$  cast on a,b,c) stainless steel disc, d,e,f) on sodium metal, g,h,i) after cycling

Silicon Nitride  
cast on a stainless  
steel disc as  
prepared

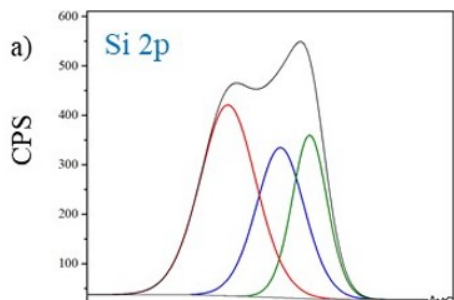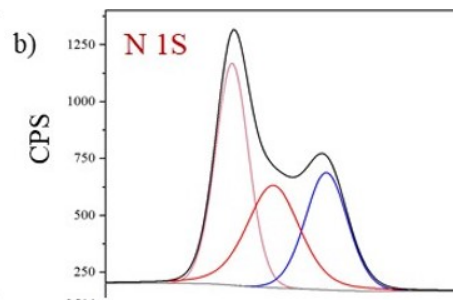

Silicon Nitride  
cast on a sodium  
metal as prepared

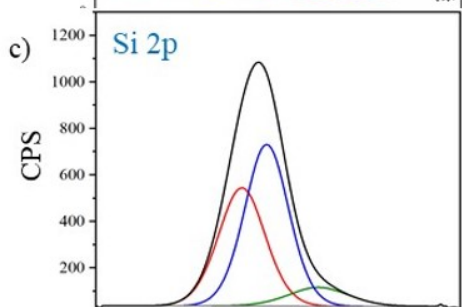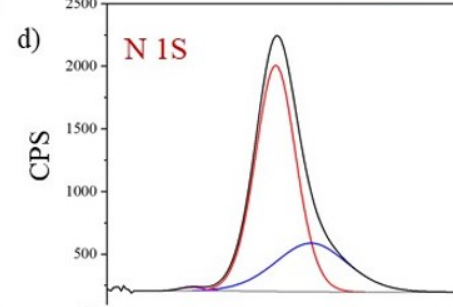

Silicon Nitride  
cast on a sodium  
metal after  
cycling

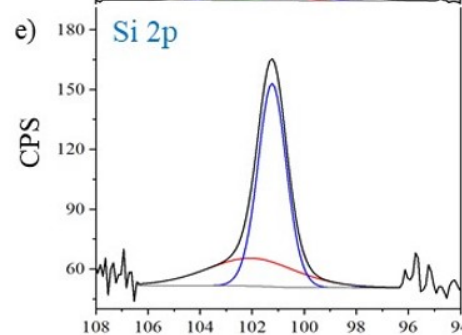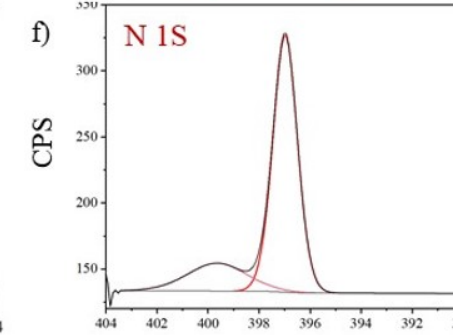

Binding energy (eV)

Binding energy (eV)

S5: High-resolution XPS spectrum of Si 2p and N 1s of as prepared 3wt% micro-sized Si<sub>3</sub>N<sub>4</sub> cast on a,b) stainless steel disc, c,d) on sodium metal, e,f) after cycling

Silicon Nitride cast on a stainless steel disc as prepared

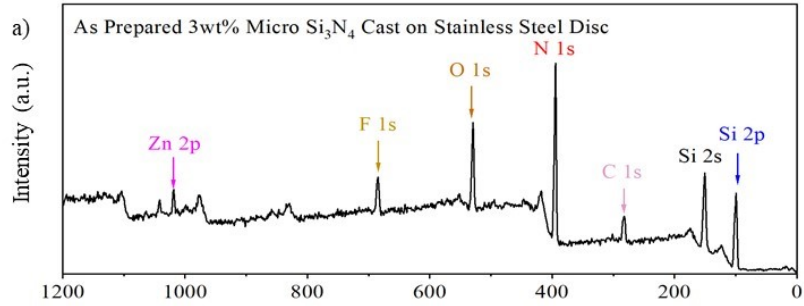

Silicon Nitride cast on a sodium metal as prepared

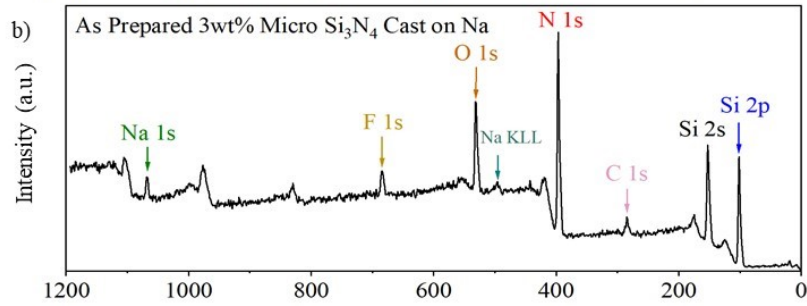

Silicon Nitride cast on a sodium metal after cycling

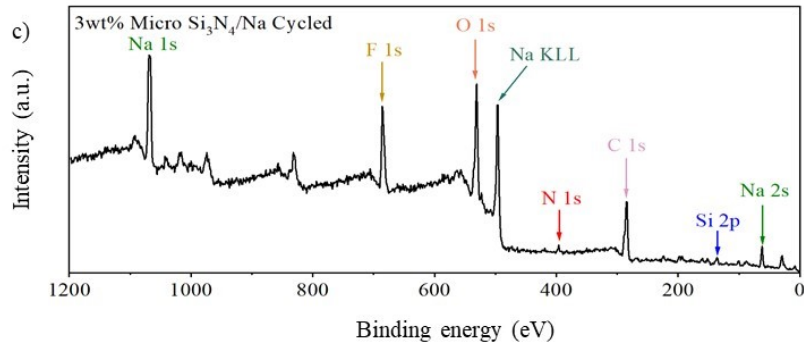

S6: ) XPS survey spectra of a) as prepared 3wt% micro-sized  $\text{Si}_3\text{N}_4$  cast on stainless steel disc, b) on sodium metal, c) after cycling

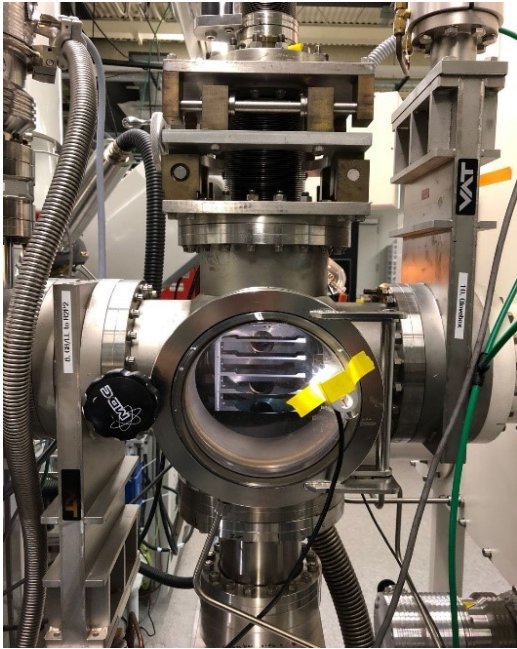

**Glovebox Load Lock**

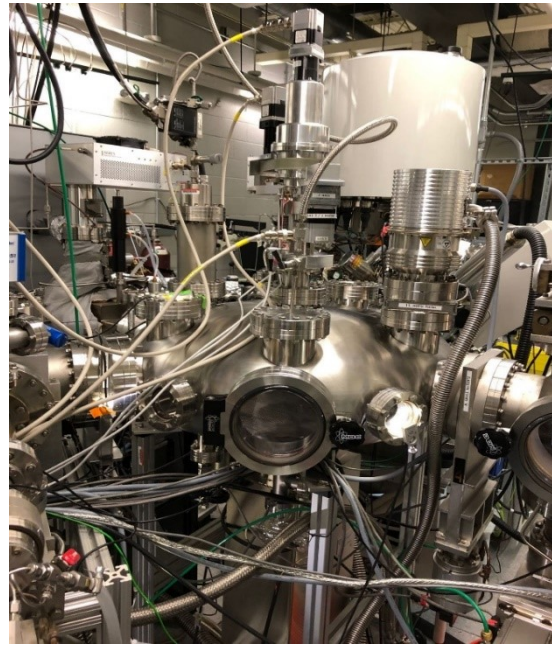

**UHV Integrated System**

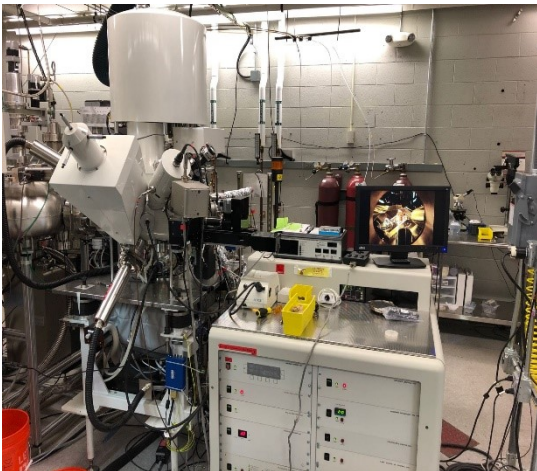

**Surface Analysis System**

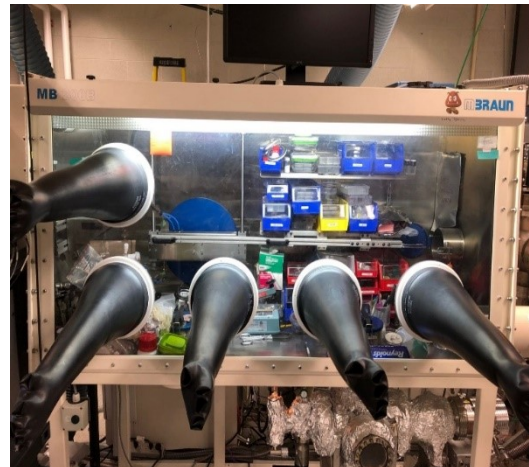

**Integrated System Glovebox**



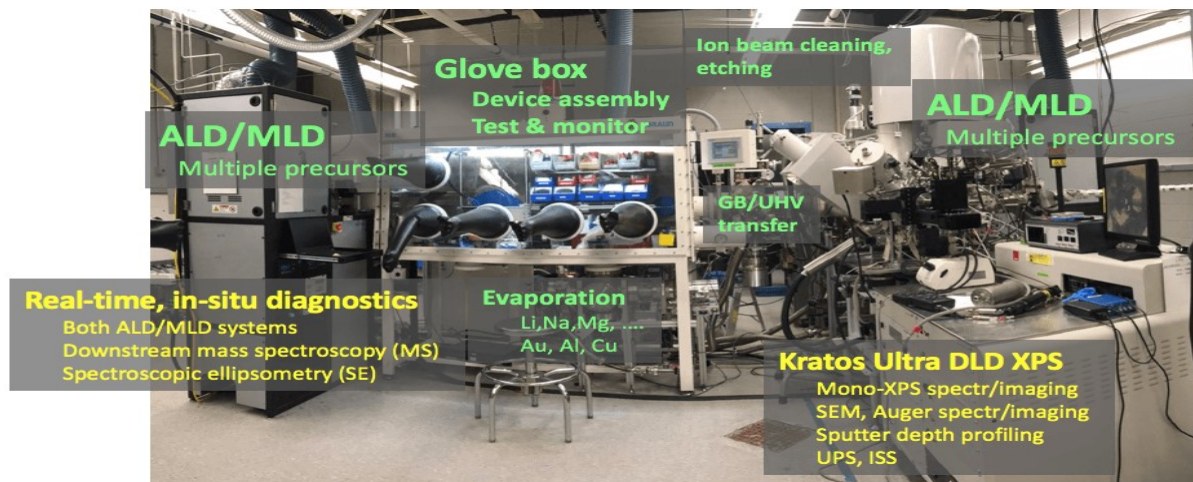

S7: Integrated XPS -glovebox system under UHV
